# Supplementary material for: LINE-1 ORF1p as a candidate biomarker in high grade serous ovarian carcinoma
Source: PubMed Central journal article supplement (PMC9883229; doi:10.1038/s41598-023-28840-5), 2023-01-27
Supplement: 41598_2023_28840_MOESM1_ESM.pdf [file 41598_2023_28840_MOESM1_ESM.pdf]

# **LINE-1 ORF1p as a candidate biomarker in high grade serous ovarian carcinoma**

Sho Sato\*, Michael Gillette\*, Pamela R. de Santiago, Eric Kuhn, Michael Burgess, Kristen Doucette, Yi Feng, Carlos Mendez-Dorantes, Paul J. Ippoliti, Sara Hobday, Marilyn A. Mitchell, Kai Doberstein, Stefan M. Gysler, Michelle S. Hirsch, Lauren Schwartz, Michael J. Birrer, Steven J. Skates, Kathleen H. Burns, Steven A. Carr, Ronny Drapkin

**Supplementary Information**

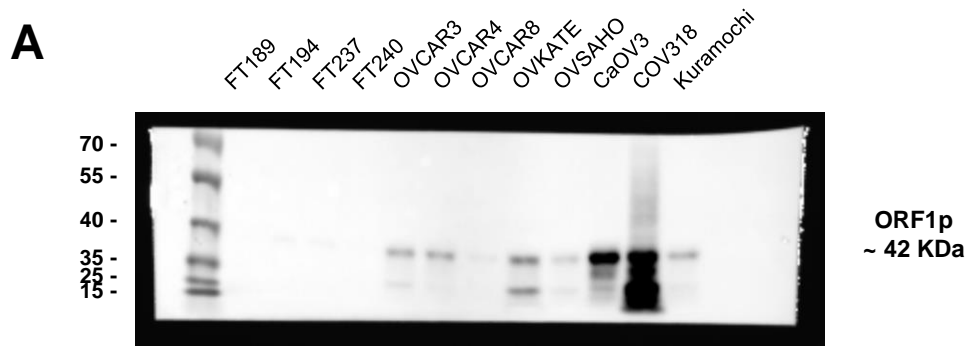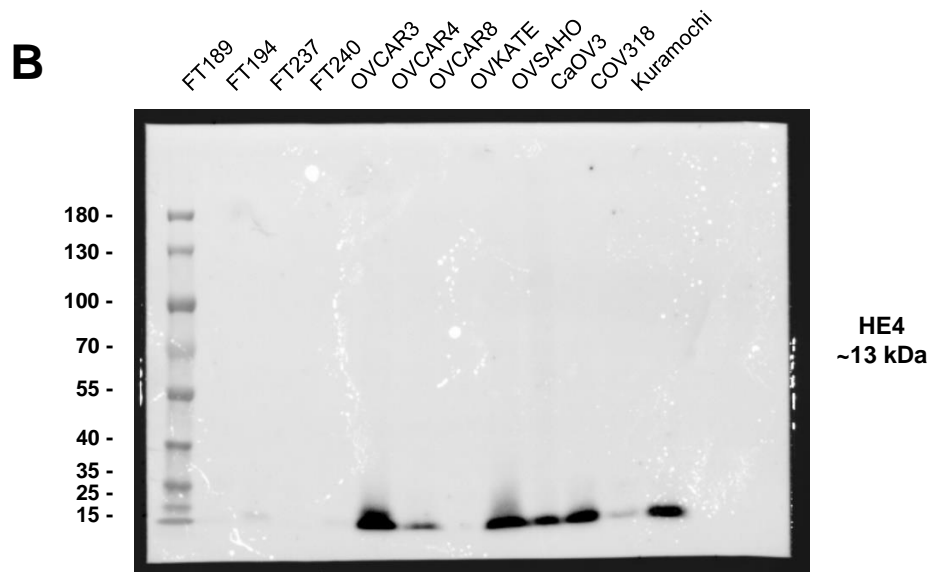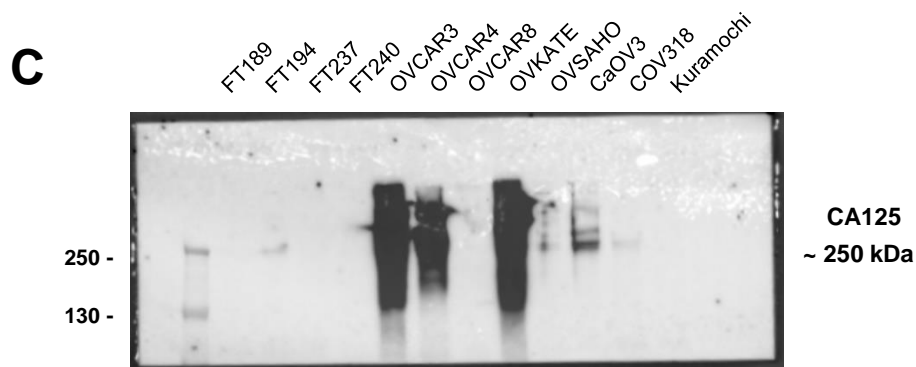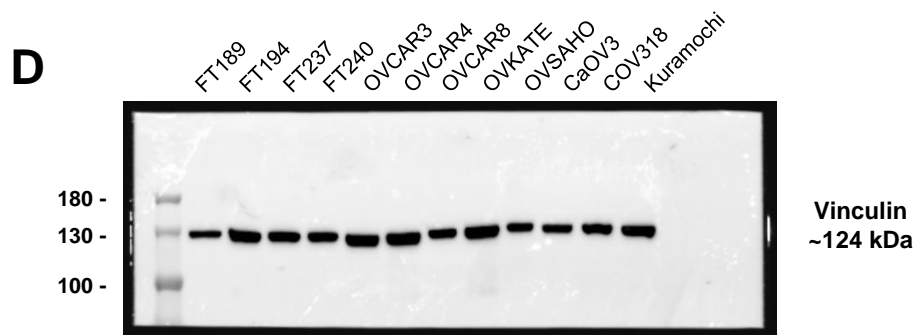

**Supplementary Figure 1. Extended data from Figure 1A. (A)** Uncropped ORF1p membrane, **(B)** uncropped HE4 membrane, **(C)** uncropped CA125 membrane, and **(D)** uncropped Vinculin membrane. Chemiluminescent and Color images were merged to show molecular weight standard (Thermo Scientific, Cat# 26616).

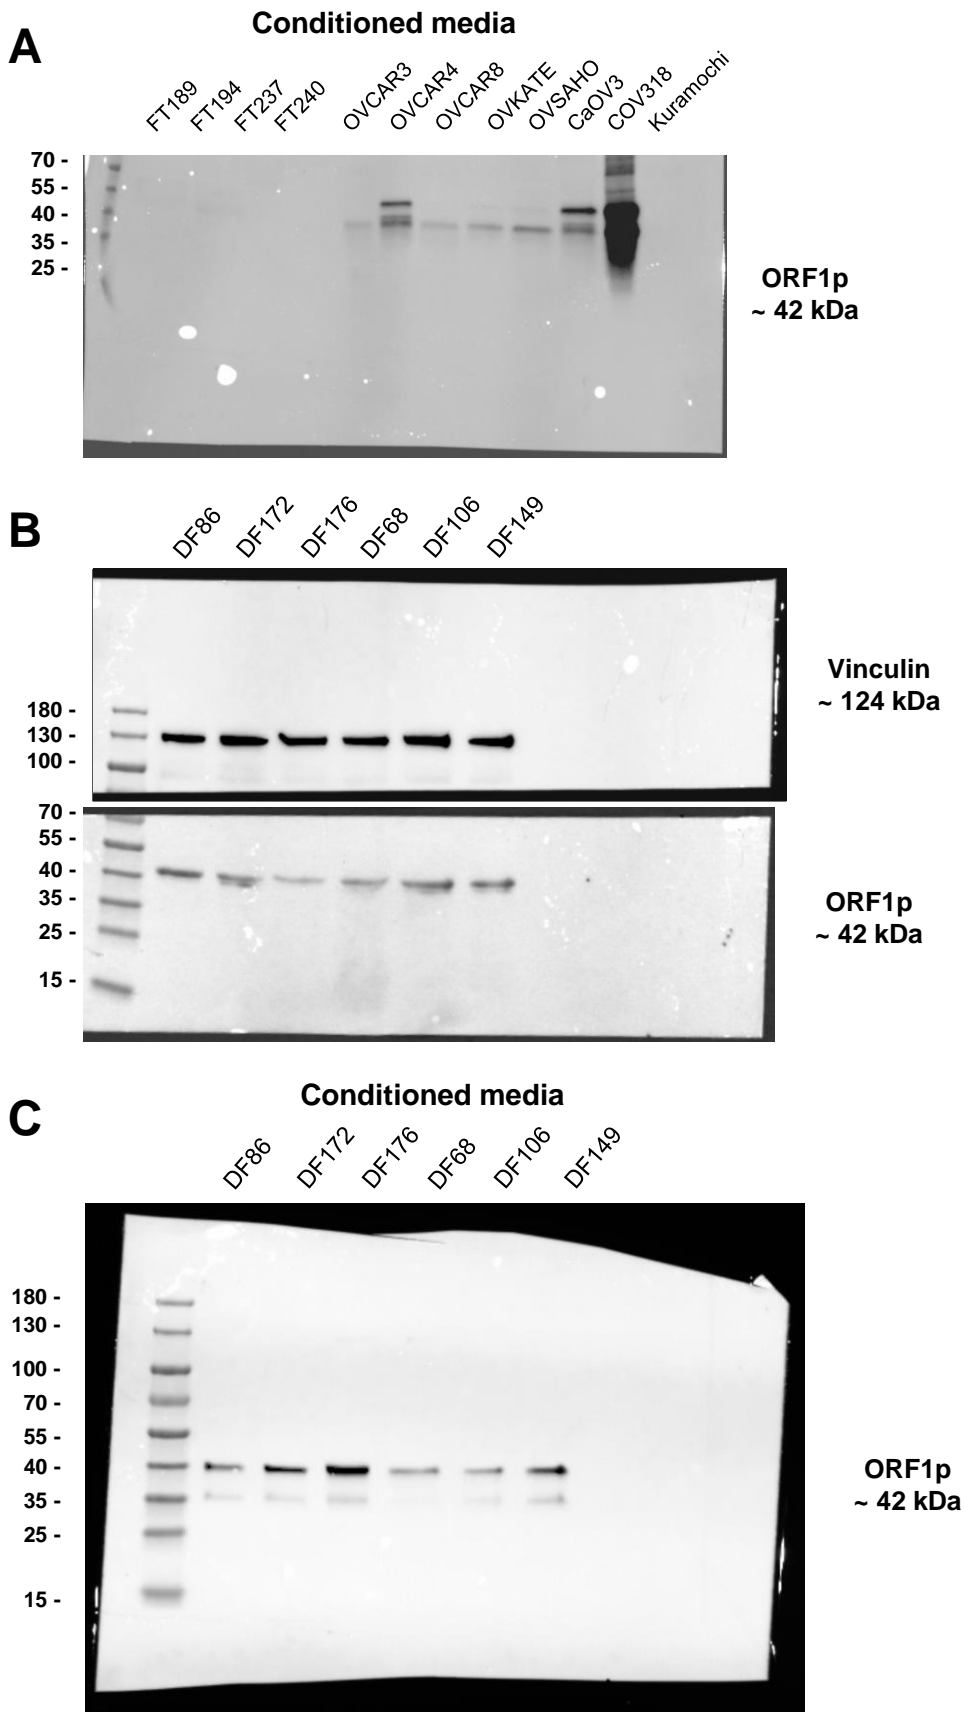

**Supplementary Figure 2. Extended data from Figure 1B, C and D. (A)** Uncropped ORF1p membrane from Fig. 1B. **(B)** Uncropped Vinculin and ORF1p membranes from Fig. 1C. **(C)** Uncropped ORF1p membrane from Fig. 1D. Chemiluminescent and Color images were merged to show molecular weight standard (Thermo Scientific, Cat# 26616).

**A**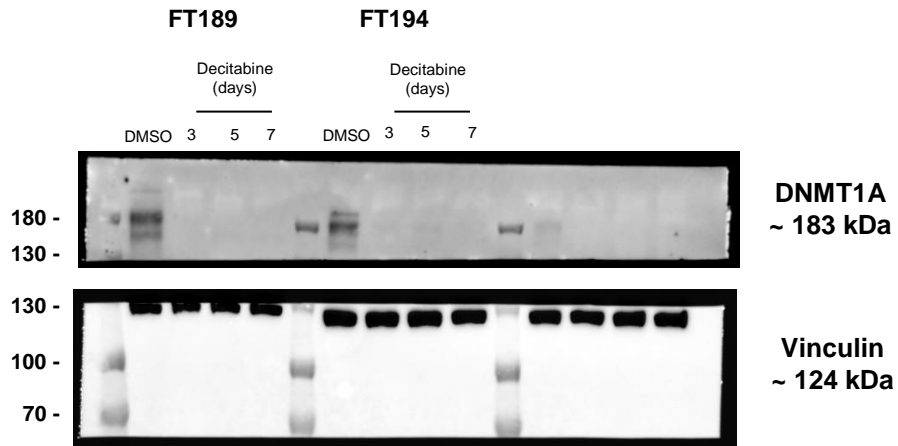**B**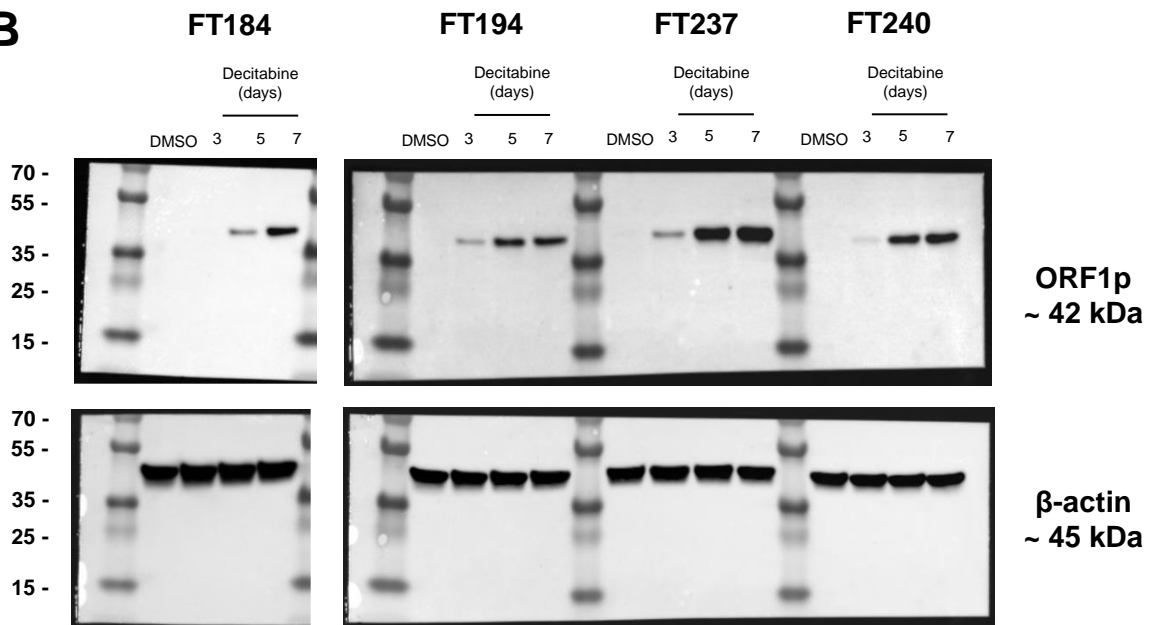

**Supplementary Figure 3. Extended data from Figure 5A and C. (A)** Uncropped DNMT1A and Vinculin membranes from Fig. 5A. **(B)** Uncropped ORF1p and  $\beta$ -actin membranes from Fig. 5C. Membranes were stripped and then re-probe. Chemiluminescent and Color images were merged to show molecular weight standard (Thermo Scientific, Cat# 26616).

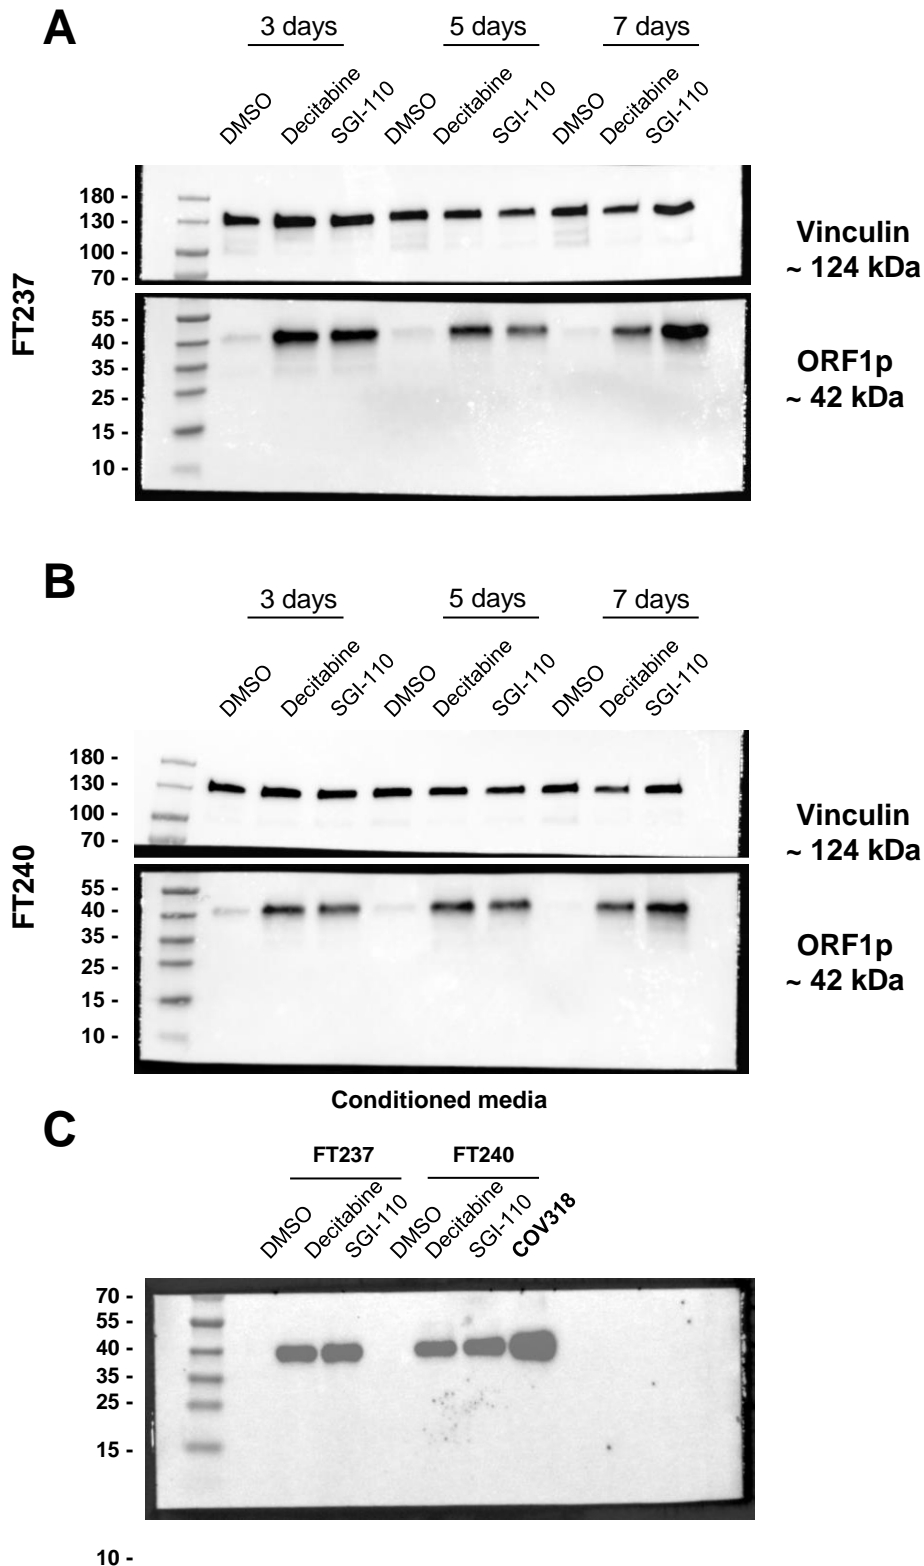

**Supplementary Figure 4. Extended data from Figure 5D and F.** Uncropped ORF1p and Vinculin membranes of **(A)** FT237 and **(B)** FT240 from Fig. 5D. **(C)** Uncropped ORF1p membrane from Fig. 5F. Chemiluminescent and Color images were merged to show molecular weight standard (Thermo Scientific, Cat# 26616).

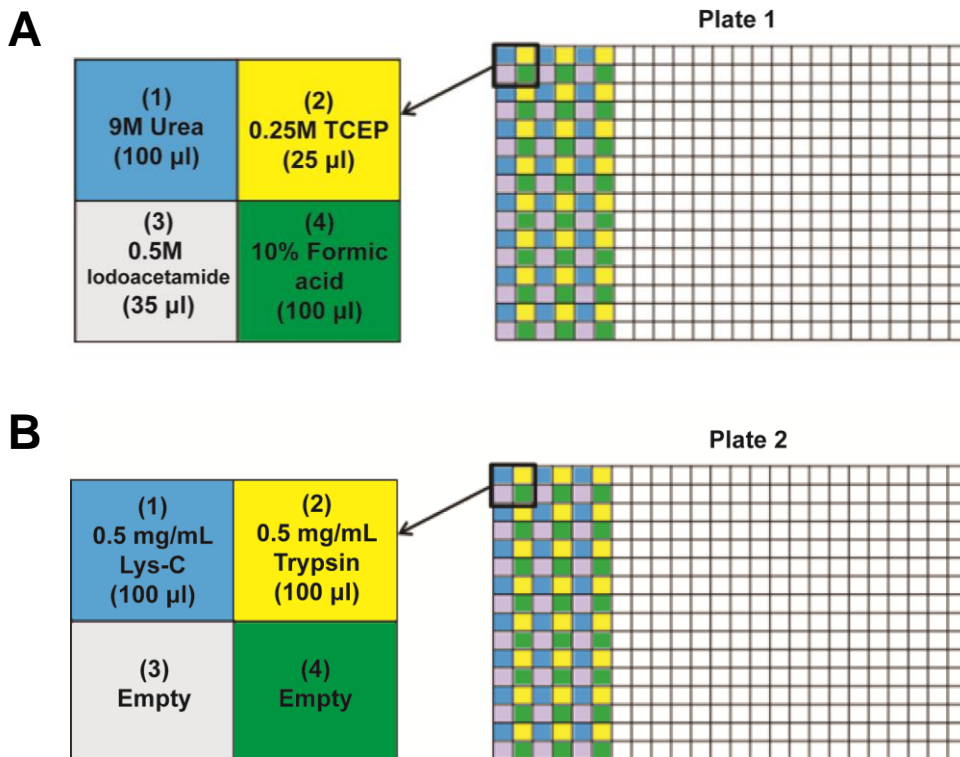

**Supplementary Figure 5. (A)** Example diagram of the locations for the digestion reagents, 9 M Urea, 0.25 M TCEP, 0.5 M IAA and 10% formic acid, as added into the first 384 well plate designated “plate 1”. Only wells that corresponded to sample wells contained reagents. Once filled, plate 1, Digestion Reagents, was placed into position 7 on the Bravo LT (see Supplementary Fig. 6). **(B)** Example diagram of the locations for the enzymes used to digest plasma, lys-C followed by trypsin, as added into the second 384 well plate designated “plate 2”. Only wells that corresponded to sample wells contained reagents. Once filled, plate 2, Enzymes, was placed into position 6 on the Bravo LT (see Supplementary Fig. 6).

|                                               |                                            |                                         |
|-----------------------------------------------|--------------------------------------------|-----------------------------------------|
| (1)<br>250 $\mu$ l<br>Transfer tips           | (2)<br>250 $\mu$ l<br>Transfer tips        | (3)<br>250 $\mu$ l<br>Transfer tips     |
| (4)<br>Temperature<br>Controlled shaker       | (5)<br>Sample plate                        | (6)<br>Enzymes<br>(384-well plate)      |
| (7)<br>Digestion reagents<br>(384-well plate) | (8)<br>250 $\mu$ l liquid<br>Transfer tips | (9)<br>0.2M Tris-HCl<br>(96-well plate) |

**Supplementary Figure 6.** Bravo LT diagram used for plasma digestion. Bravo deck positions as numbered contained the either the transfer tips, reagent plates or solvent plates for digestion. Plasma was added to the 96 deep well sample plate and placed onto position 5. After each reagent addition step, the robot moved the sample plate to position 4 where the plasma samples were mixed and incubated as described in Methods.

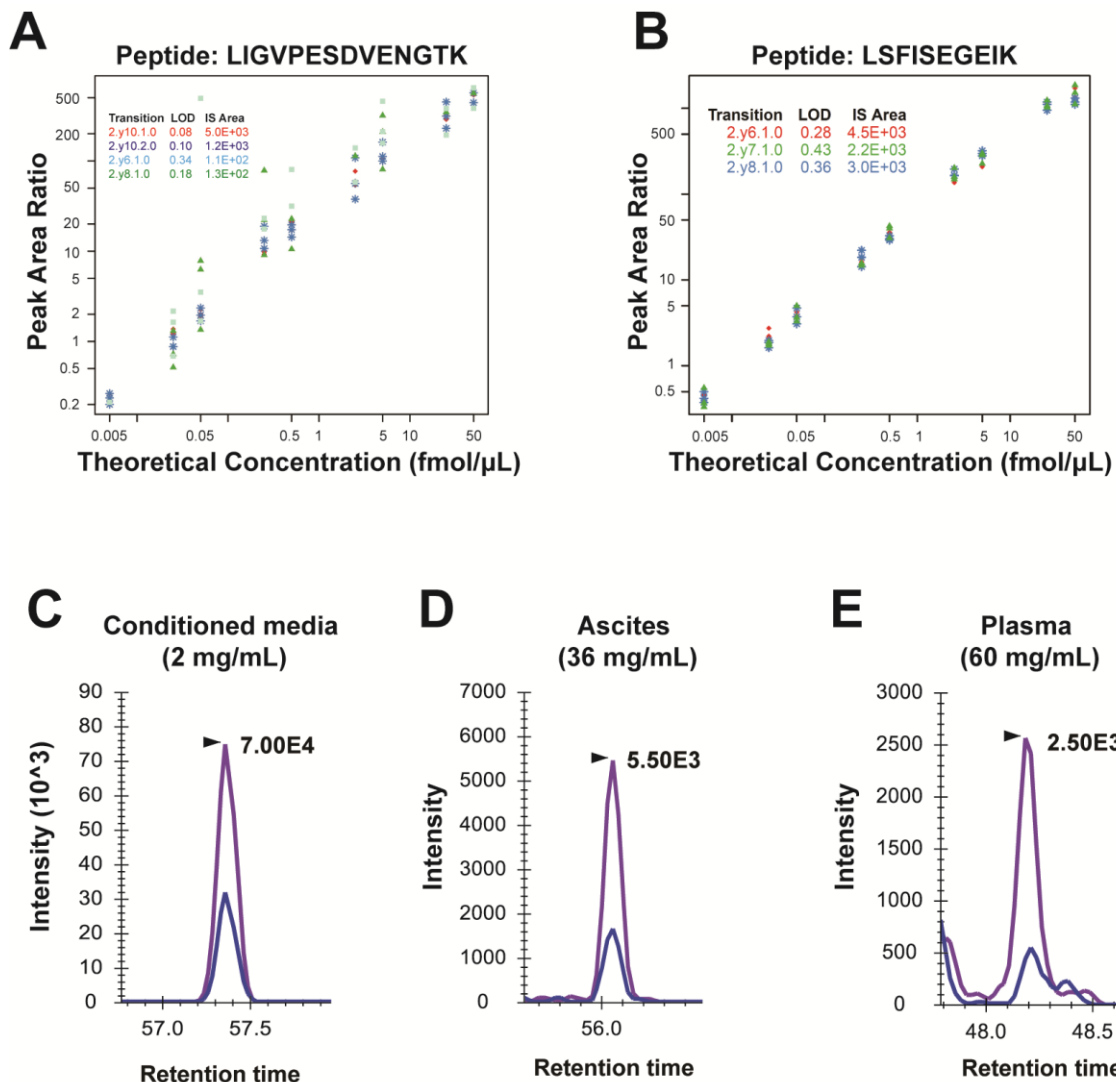

**Supplementary Figure 7.** Response curves across a range of heavy peptide spike concentrations for the best transitions for ORF1p peptide **(A)** LIGVPESDVENGTK and **(B)** LSFISEGEIK are used to determine limits of detection (LODs) assuming an endogenous concentration of 1 fmol/ $\mu$ L plasma. LODs are calculated using the measurement level and variation observed in the blank and low concentration samples. **(C)** Extracted ion chromatograms (XICs) for two (purple and blue lines) light (endogenous) transitions for ORF1p peptide LSFISEFEIK for representative samples of conditioned cancer cell line serum-free media (total protein concentration = 2 mg/mL), **(D)** patient ascites fluid (total protein concentration = 36 mg/mL), and **(E)** plasma (total protein concentration = 60 mg/mL). The y8 transition ion 561.80/922.48 was removed due to an interference in the plasma samples. While representative, samples were not isolated from the same patient.



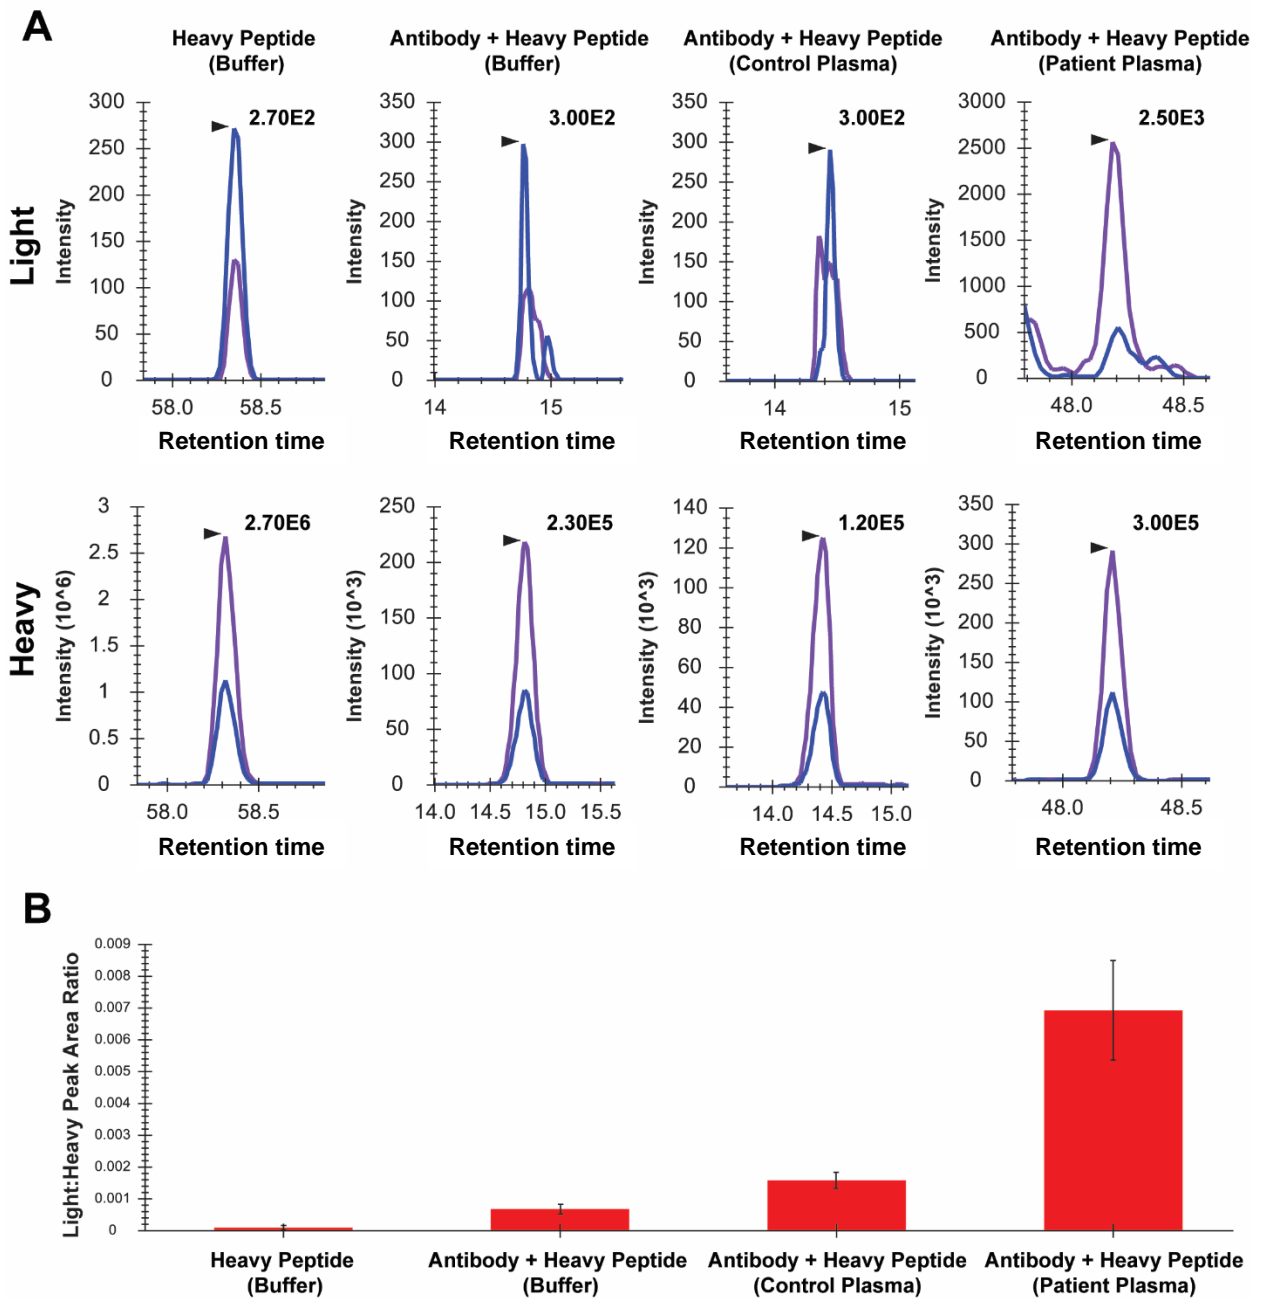

**Supplementary Figure 8. (A)** Extracted ion chromatograms (XICs) for two transitions for the light (endogenous) and heavy standard versions of ORF1p peptide LSFISEGEIK monitored in samples containing heavy peptide standard alone, heavy peptide standard immunoaffinity-enriched from buffer or control plasma, or heavy peptide standard spiked into patient plasma. Observed maximum transition intensities (peak heights) denoted by the arrowheads are listed in scientific notation. The y8 transition ion 561.80/922.48 was removed due to an interference in the plasma samples. **(B)** Light to heavy peak area ratio as calculated in Skyline for the corresponding samples. Error bars represent standard error.

**Supplementary Table 1.** Clinical characteristics of the 72 ovarian cancer patients studied

| Clinical feature                     | Percentage |
|--------------------------------------|------------|
| <b>Ovarian cancer classification</b> |            |
| Papillary serous carcinoma           | 89%        |
| Serous borderline                    | 11%        |
| <b>Stages</b>                        |            |
| Stage I                              | 10%        |
| Stage II                             | 4%         |
| Stage III                            | 60%        |
| Stage IV                             | 25%        |
| <b>Grade</b>                         |            |
| Grade I                              | 3%         |
| Grade II                             | 12%        |
| Grade III                            | 75%        |
| N/A                                  | 8%         |

**Supplementary Table 2.** List of cell lines used in these studies

| Cell lines                | Cell line origin                                       | Media               |
|---------------------------|--------------------------------------------------------|---------------------|
| Fallopian tube cell lines | Drapkin lab                                            | DMEM/F12 + 2% USG   |
| DF-cell lines             | Drapkin lab                                            | RPMI 1640 + 10% FBS |
| KURAMOCHI                 | Japanese Collection of Research Bioresources Cell Bank | RPMI 1640 + 10% FBS |
| OVCAR3                    | ATCC                                                   | RPMI 1640 + 10% FBS |
| OVCAR4                    | ATCC                                                   | RPMI 1640 + 10% FBS |
| OVKATE                    | Japanese Collection of Research Bioresources Cell Bank | RPMI 1640 + 10% FBS |
| COV318                    | European Collection of Authenticated Cell Cultures     | DMEM + 10% FBS      |
| OVSAHO                    | Gottfried Konecny (UCLA)                               | RPMI 1640 + 10% FBS |
| CAOV3                     | ATCC                                                   | DMEM + 10% FBS      |
| OVCAR8                    | ATCC                                                   | RPMI 1640 + 10% FBS |

**Supplementary Table 3. Materials used in these studies**

| Chemicals               | Company          | Cat number |
|-------------------------|------------------|------------|
| Decitabine              | Tocris           | 2624       |
| SGI-110 (Guadecitabine) | Adooq bioscience | A12744     |

| Antibody     | Company        | Cat number | Species | Methods/Dilution      |
|--------------|----------------|------------|---------|-----------------------|
| LINE-1 ORF1p | EMD Millipore  | MABC1152   | M       | WB 1:1000<br>IF 1:500 |
| Beta actin   | Cell signaling | #3700      | M       | WB 1:1000             |
| HE4          | abcam          | ab200828   | R       | WB 1:1000             |
| CA125        | BIORAD         | VMA00070   | M       | WB 1:1000             |
| GAPDH        | Cell signaling | #2118      | R       | WB 1:1000             |

**Supplementary Table 4.**

| Sample group                            | Ratio Light to Heavy | Average  | Standard deviation | CV     | t-test    | t-comparison       |
|-----------------------------------------|----------------------|----------|--------------------|--------|-----------|--------------------|
| 1 - Heavy peptide                       | 0                    | 0.0001   | 0.0001             | 100.0% | 0.005785  | Group 1 to Group 2 |
| 1 - Heavy peptide                       | 0.0002               |          |                    |        |           |                    |
| 1 - Heavy peptide                       | 0.0001               |          |                    |        |           |                    |
| 2 - Ab + heavy peptide + buffer         | 0.0005               | 0.000667 | 0.000153           | 22.9%  | 0.008821  | Group 2 to Group 3 |
| 2 - Ab + heavy peptide + buffer         | 0.0008               |          |                    |        |           |                    |
| 2 - Ab + heavy peptide + buffer         | 0.0007               |          |                    |        |           |                    |
| 3 - Ab + heavy peptide + control plasma | 0.0014               | 0.001567 | 0.000289           | 18.4%  | 0.004143* | Group 3 to Group 4 |
| 3 - Ab + heavy peptide + control plasma | 0.0019               |          |                    |        |           |                    |
| 3 - Ab + heavy peptide + control plasma | 0.0014               |          |                    |        |           |                    |
| 4 - Ab + heavy peptide + patient plasma | 0.0058               | 0.006933 | 0.00155            | 22.4%  | 0.001593* | Group 4 to Group 1 |
| 4 - Ab + heavy peptide + patient plasma | 0.0087               |          |                    |        |           |                    |
| 4 - Ab + heavy peptide + patient plasma | 0.0063               |          |                    |        |           |                    |
